# Supplementary material for: Bacillus velezensis ZN-S10 Reforms the Rhizosphere Microbial Community and Enhances Tomato Resistance to TPN
Source: Plants (Basel). 2023 Oct 21;12(20):3636. doi: 10.3390/plants12203636 (PMC10609795; doi:10.3390/plants12203636)
Supplement: Supplementary file 1 [file plants-12-03636-s001.zip › supplementary table.xlsx]

## Sheet: S1- Control efficacy 
Table S1: Control efficacy
Treatment	Disease index	Disease reduction
WP	65.500±2.8940a	-
BP	26.0000±2.3184b	60.3050±3.5395
WW	-	-
Different lowercase letters within the same column indicate a significant difference between treatments (p < 0.05).

## Sheet: S2-Summary on raw data process
Table S2: Summary on raw data process
	Group	Raw CCS	Clean CCS	Effective CCS	AvgLen(bp)	Effective(%)
Bacteria	WP1	13057	13055	12671	1447	97.04
	WP2	13509	13505	13075	1447	96.79
	WP3	12608	12608	12235	1446	97.04
	WP4	14233	14231	13985	1447	98.26
	WP5	12797	12794	12498	1449	97.66
	BP1	11810	11810	11548	1446	97.78
	BP2	14174	14174	13612	1453	96.03
	BP3	13956	13956	13535	1453	96.98
	BP4	13808	13808	13515	1455	97.88
	BP5	14884	14880	14185	1450	95.3
	WW1	12429	12429	11814	1455	95.05
	WW2	12250	12250	11726	1456	95.72
	WW3	12090	12090	11552	1455	95.55
	WW4	14429	14429	13741	1456	95.23
	WW5	13957	13957	13490	1451	96.65
Fungi	WP1	14260	14258	14098	581	98.86
	WP2	13846	13846	13683	557	98.82
	WP3	9484	9457	9373	545	98.83
	WP4	12734	12734	12566	582	98.68
	WP5	12909	12909	12709	577	98.45
	BP1	13687	13687	13190	580	96.37
	BP2	12898	12898	12850	609	99.63
	BP3	12876	12876	12442	583	96.63
	BP4	14923	14923	14779	603	99.04
	BP5	13418	13418	12877	554	95.97
	WW1	14140	14140	14122	562	99.87
	WW2	11748	11748	11019	572	93.79
	WW3	12133	12133	11359	574	93.62
	WW4	12322	12322	12237	581	99.31
	WW5	11906	11906	11848	588	99.51
Raw-CCS: Counts of identified CCS reads in the sample
Clean CCS: Counts of clean CCS reads(post primer removal and length filtration)
Effective-CCS: Counts of effective CCS reads after chimeric reads removal
AvgLen(bp): Average length reads in the sample
Effective(%): Percentage of effective CCS reads in raw reads

## Sheet: S3-PERMANOVA Analysis
Table S3: PERMANOVA Analysis
		Df	SumsOfSqs	MeanSqs	F.Model	R2	Pr(>F)
Bacteria	WP / BP	1	0.351573	0.351573	8.08167	0.502539	0.008
	WP/ WW	1	0.394244	0.394244	9.82883	0.551289	0.01
	BP / WW	1	0.269553	0.269553	4.4802	0.358985	0.012
Fungi	WP / BP	1	0.478771	0.478771	6.95857	0.465189	0.008
	WP/ WW	1	0.557863	0.557863	5.5843	0.411085	0.008
	BP / WW	1	0.226162	0.226162	2.07918	0.206285	0.079

## Sheet: S4- Kruskal–Wallis H test
Table S4: Kruskal–Wallis H test
	Genus	P
Bacteria	Rhodanobacter	0.1604
	Chitinophaga	0.024
	Luteolibacter	0.0686
	Flavisolibacter	0.0178
	Mucilaginibacter	0.7788
	Massilia	0.1451
	Pedobacter	0.0299
	Frateuria	0.0122
	unclassified_Chitinophagaceae	0.6188
	uncultured_Candidatus_Saccharibacteria_bacterium	0.0652
Fungi	Plectosphaerella	0.04783
	Penicillium	0.4819
	Talaromyces	0.02065
	Cladosporium	0.06654
	Alternaria	0.03439
	Trichocladium	0.0233
	Meyerozyma	0.1451
	unclassified_Fungi	0.005248
	unidentified	0.008148
	Duddingtonia	0.00911

## Sheet: S5- Correlations networks
Table S5: Correlations networks
Network propertiesa	WW	WP	BP
Number of nodes	392	595	450
Number of edges	5102	12070	6704
Positive edgesc	0.5764	0.5212	0.5059
Negative edgesd	0.4236	0.4788	0.4941
Modularitye	18.658	7.927	2.724
Number of communities	4	10	10
Average degree	26.031	40.571	29.796
Number of nodes	Microbial taxon (at genus level) with at least one significant (P < 0.05) and strong (R> 0.6or < -0.6) correlation;
Number of edges	Number of connections/correlations obtained by Spearman analysis;
Positive edgesc	positive correlation (R> 0.6 with P < 0.05);
Negative edgesd	negative correlation (R< -0.6 with P < 0.05);
Modularitye	The capability of the nodes to form highly connected communities, that is, a structure with high density of between nodes connections (inferred by Gephi);
Number of communities	A community is defined as a group of nodes densely connected internally (Gephi);
Average degree	The average number of connections per node in the network, that is, the node connectivity (Gephi);

## Sheet: S6-TOP 10 Phylum in network
Table S6: TOP 10 Phylum in network
	Phylum	Proportions(%)
WW	Proteobacteria	30.87
	Bacteroidota	21.68
	Firmicutes	10.97
	Ascomycota	8.67
	Verrucomicrobiota	6.38
	Actinobacteriota	3.06
	Patescibacteria	2.3
WP	Proteobacteria	29.75
	Bacteroidota	18.49
	Ascomycota	7.39
	Patescibacteria	5.55
	Verrucomicrobiota	5.55
	Firmicutes	4.54
	Actinobacteriota	3.36
BW	Proteobacteria	31.33
	Bacteroidota	22.44
	Ascomycota	7.11
	Firmicutes	6.22
	Verrucomicrobiota	5.33
	Actinobacteriota	3.78
	Patescibacteria	2.44

## Sheet: Correlation analysis of ZN-S10
Table S7: Correlation analysis of ZN-S10
	ID	Correlation with ZN-S10	Phylum	Genus	R	P
	BOTU101	Negative	Verrucomicrobiota	Candidatus_Xiphinematobacter	-0.858678	0.00485131
	BOTU109	Negative	Bacteroidota	Pedobacter	-0.86261	0.00472732
	BOTU121	Negative	Verrucomicrobiota	Luteolibacter	-0.856568	0.00485131
	BOTU128	Negative	Proteobacteria	Candidimonas	-0.884652	0.00389844
	BOTU13	Negative	Patescibacteria	uncultured_Candidatus_Saccharibacteria_bacterium	-0.846121	0.00534898
	BOTU198	Negative	Verrucomicrobiota	Luteolibacter	-0.861461	0.00472732
	BOTU22	Negative	Bacteroidota	Puia	-0.876523	0.0042886
	BOTU239	Negative	Bacteroidota	unclassified_Chitinophagaceae	-0.856568	0.00485131
	BOTU311	Negative	Verrucomicrobiota	Terrimicrobium	-0.864272	0.00472732
	BOTU386	Negative	Proteobacteria	unclassified_Reyranellaceae	-0.854687	0.00488083
	BOTU397	Negative	Proteobacteria	Aminobacter	-0.873863	0.00444848
	BOTU425	Negative	Proteobacteria	Sphingomonas	-0.887794	0.00372661
	BOTU447	Negative	Abditibacteriota	Abditibacterium	-0.867411	0.00472732
	BOTU53	Negative	Proteobacteria	Mesorhizobium	-0.846121	0.00534898
	BOTU565	Negative	Abditibacteriota	Abditibacterium	-0.881733	0.00406354
	BOTU610	Negative	Proteobacteria	Burkholderia_Caballeronia_Paraburkholderia	-0.840788	0.0056839
	BOTU169	Positive	Bacteroidota	Mucilaginibacter	0.887412	0.00372661
	BOTU183	Positive	Proteobacteria	Phenylobacterium	0.890176	0.00372661
	BOTU278	Positive	Armatimonadota	Armatimonas	0.842615	0.00554972
	BOTU282	Positive	Actinobacteriota	Cellulomonas	0.89585	0.00360609
	BOTU301	Positive	Actinobacteriota	unclassified_Acidimicrobiia	0.841656	0.00560446
	BOTU323	Positive	Proteobacteria	unclassified_Rickettsiaceae	0.89418	0.00360742
	BOTU334	Positive	Actinobacteriota	Gryllotalpicola	0.887419	0.00372661
	BOTU377	Positive	Bdellovibrionota	uncultured_Bacteriovorax_sp.	0.836006	0.00615492
	BOTU452	Positive	Firmicutes	Paenibacillus	0.890198	0.00372661
	BOTU578	Positive	Proteobacteria	unclassified_Diplorickettsiaceae	0.909867	0.00302851
	BOTU62	Positive	Bacteroidota	Parasegetibacter	0.876523	0.0042886
	BOTU669	Positive	Proteobacteria	Microvirga	0.861175	0.0047279
	BOTU671	Positive	Planctomycetota	Tepidisphaera	0.936508	0.00180647
	BOTU731	Positive	Firmicutes	Pullulanibacillus	0.890198	0.00372661
	BOTU74	Positive	Bacteroidota	Chitinophaga	0.872989	0.00451093
	BOTU815	Positive	Bacteroidota	uncultured_Sphingobacteriales_bacterium	0.976408	0.000162682
	BOTU820	Positive	Proteobacteria	Methylocapsa	0.861118	0.0047279
	BOTU865	Positive	Proteobacteria	Noviherbaspirillum	0.830145	0.00665255
	BOTU926	Positive	Armatimonadota	Armatimonas	0.865599	0.00472732
Fungi	FOTU53	Negative	Ascomycota	Pseudogymnoascus	-0.887794	0.00372661
	FOTU19	Positive	Ascomycota	Fusarium	0.876523	0.0042886
	FOTU20	Positive	Ascomycota	Arthrobotrys	0.872997	0.00451093
BOTU is bacteria；FOTU is fungi.
